# Supplementary material for: Targeting PBK/TOPK decreases growth and survival of glioma initiating cells in vitro and attenuates tumor growth in vivo
Source: Springer Nature journal article supplement (doi:10.1186/s12943-015-0398-x), 2015-06-16
Supplement: MOESM1 [file 9763150]

| <b>GBM culture</b> | <b>Fold expression</b> | <b>Std. Error</b> | <b>95% C.I.</b> | <b>P(H1)</b> | <b>Result</b> |
|--------------------|------------------------|-------------------|-----------------|--------------|---------------|
| fNPCs              | 3,86                   | 1,459-8,245       | 0,796-15,203    | 0,057        |               |
| T65                | 26,765                 | 17,266-55,678     | 8,903-73,714    | 0            | UP            |
| CAST 3             | 27,131                 | 22,189-33,507     | 19,765-36,902   | 0,024        | UP            |
| T08                | 43,583                 | 7,866-181,984     | 5,143-242,061   | 0            | UP            |
| CAST4              | 25,346                 | 22,623-28,683     | 20,152-31,589   | 0,028        | UP            |
| T96                | 48,294                 | 8,348-179,194     | 7,392-210,374   | 0            | UP            |
| T111               | 18,842                 | 3,229-72,695      | 2,783-83,822    | 0            | UP            |
| T59                | 23,122                 | 3,974-74,070      | 2,685-148,621   | 0,001        | UP            |

**Supplementary Table -1**
