# Supplementary material for: Targeting PBK/TOPK decreases growth and survival of glioma initiating cells in vitro and attenuates tumor growth in vivo
Source: Springer Nature journal article supplement (doi:10.1186/s12943-015-0398-x), 2015-06-16
Supplement: MOESM4 [file 9763150]

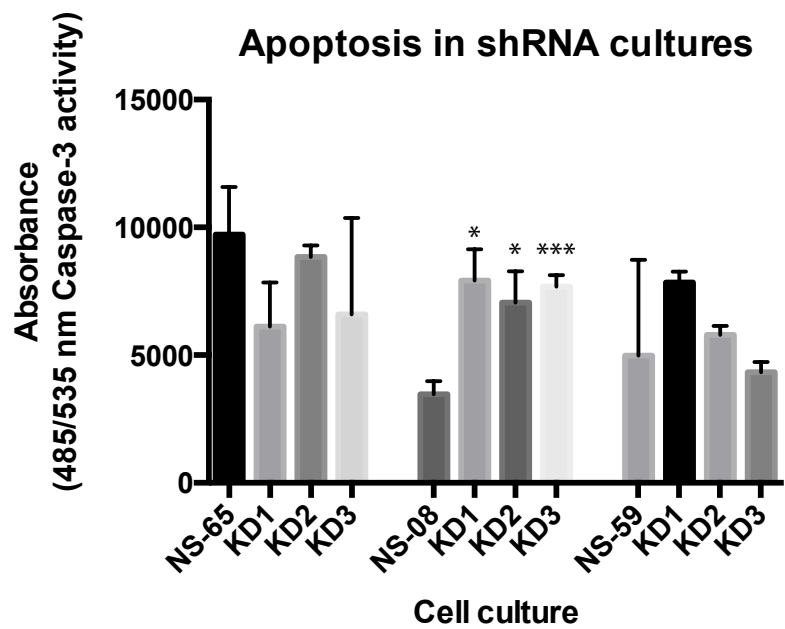

Supplementary Figure 2
