# Supplementary material for: Targeting PBK/TOPK decreases growth and survival of glioma initiating cells in vitro and attenuates tumor growth in vivo
Source: Springer Nature journal article supplement (doi:10.1186/s12943-015-0398-x), 2015-06-16
Supplement: MOESM10 [file 9763150]

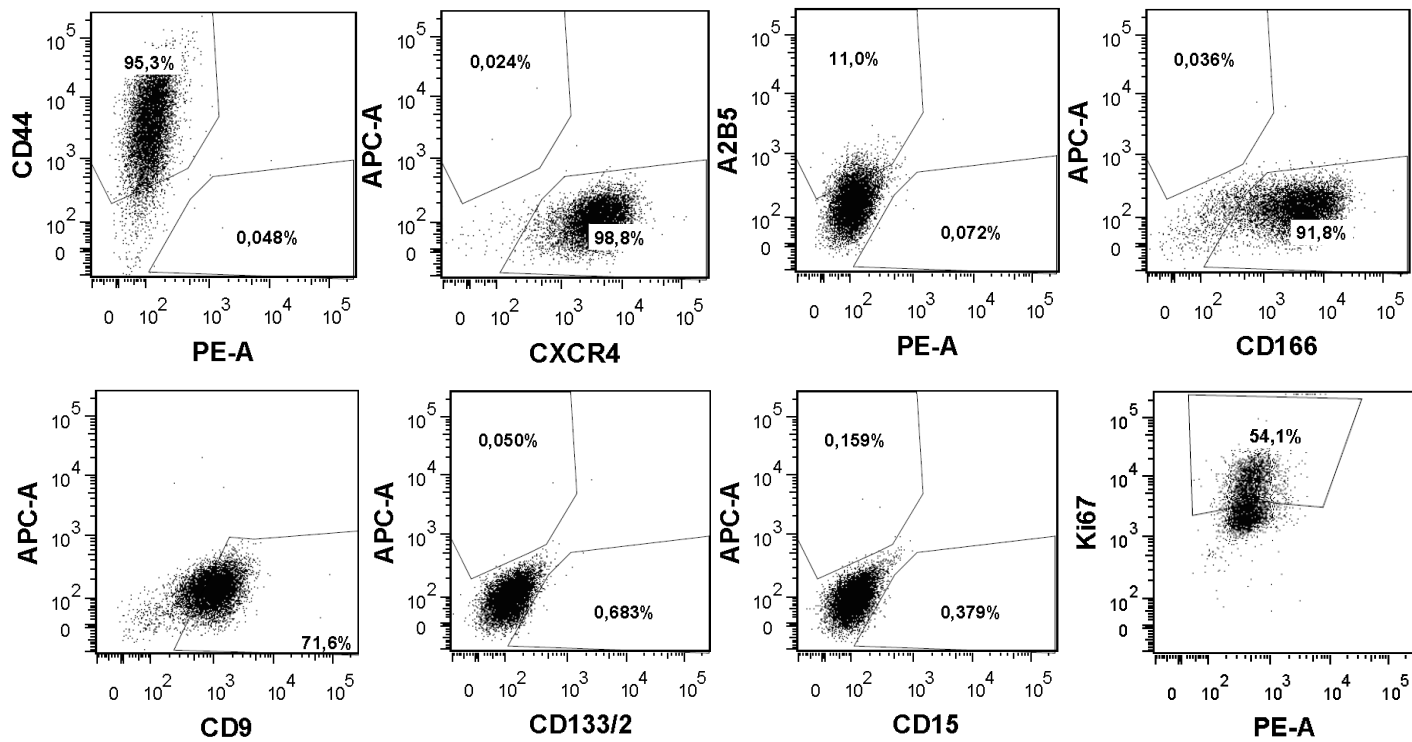

| Tumor | CD44 | CXCR4 | A2B5 | CD166 | CD9 | CD133 | CD15 | Ki67 |
|-------|------|-------|------|-------|-----|-------|------|------|
| T08   | 81%  | 31%   | 34%  | 58%   | 73% | 54%   | 52%  | 55%  |
| T65   | 95%  | 97%   | 11%  | 90%   | 69% | 0%    | 0%   | 53%  |
| T59   | 70%  | 74%   | 66%  | 63%   | 11% | 0%    | 6%   | -*   |

**Supplementary Figure 5**
